# Supplementary material
Source: publisher site journal article supplement (https://www.dovepress.com/article/333586)
Supplement: Supplementary file 1 [file get_supplementary_file.php]

**Supplementary materials**

**Appendix 1:** Summary of information through factor analysis for independent variables

| **The parameters** | **First EFA** | **Second EFA** | **Benchmark**** |
| --- | --- | --- | --- |
| KMO | 0.905 | 0.904 | > 0.5 |
| Eigenvalues coefficient | 1.122 | 1.116 | > 1 |
| Bartlett sig value | 0.000 | 0.000 | < 0.05 |
| Total variance extracted | 75.445 % | 80.045 % | > 50% |

****Note**: The Benchmark bases on a previous study.1

**Reference**

1. Hair JF, ed. *Multivariate Data Analysis*. 7th ed. Prentice Hall; 2010.

**Appendix 2:** Last Factor Rotation Matrix

|  | Factor | | | | | | | |
| --- | --- | --- | --- | --- | --- | --- | --- | --- |
| 1 | 2 | 3 | 4 | 5 | 6 | 7 | 8 |
| PERVA1 |  | .842 |  |  |  |  |  |  |
| PERVA2 |  | .915 |  |  |  |  |  |  |
| PERVA4 |  | .803 |  |  |  |  |  |  |
| PERVA5 |  | .963 |  |  |  |  |  |  |
| PERVA6 |  | .883 |  |  |  |  |  |  |
| EMOTI1 |  |  |  |  |  |  | .841 |  |
| EMOTI2 |  |  |  |  |  |  | .890 |  |
| EMOTI3 |  |  |  |  |  |  | .755 |  |
| SOFLU1 |  |  |  |  |  |  |  | .940 |
| SOFLU2 |  |  |  |  |  |  |  | .618 |
| SOFLU3 |  |  |  |  |  |  |  | .700 |
| FUNTI1 |  |  |  |  | .928 |  |  |  |
| FUNTI3 |  |  |  |  | .680 |  |  |  |
| FUNTI4 |  |  |  |  | .718 |  |  |  |
| FUNTI5 |  |  |  |  | .902 |  |  |  |
| SATIS1 |  |  | .871 |  |  |  |  |  |
| SATIS2 |  |  | .686 |  |  |  |  |  |
| SATIS3 |  |  | .739 |  |  |  |  |  |
| SATIS4 |  |  | .967 |  |  |  |  |  |
| SATIS5 |  |  | .832 |  |  |  |  |  |
| REVISI1 |  |  |  |  |  | .971 |  |  |
| REVISI2 |  |  |  |  |  | .694 |  |  |
| REVISI3 |  |  |  |  |  | .914 |  |  |
| WOROFM1 | .732 |  |  |  |  |  |  |  |
| WOROFM2 | .842 |  |  |  |  |  |  |  |
| WOROFM3 | .934 |  |  |  |  |  |  |  |
| WOROFM4 | .884 |  |  |  |  |  |  |  |
| WOROFM5 | .945 |  |  |  |  |  |  |  |
| WOROFM6 | .975 |  |  |  |  |  |  |  |
| TRUST1 |  |  |  | .833 |  |  |  |  |
| TRUST2 |  |  |  | .988 |  |  |  |  |
| TRUST3 |  |  |  | .691 |  |  |  |  |
| TRUST4 |  |  |  | .830 |  |  |  |  |
